# Supplementary material for: Porous materials as delivery and protective agents for Vitamin A
Source: Royal Society of Chemistry journal article supplement (doi:10.1039/c6ra12026a), 2016-01-01
Supplement: c6ra12026a1.pdf [file c6ra12026a1.pdf]

## Porous materials as delivery and protective agents for Vitamin A

**Ilaria Calabrese,<sup>a,b</sup> Maria Liria Turcoliveri,<sup>b</sup> Maria João Ferreira<sup>d</sup>, Artur Bento<sup>a</sup>,  
Pedro D. Vaz,<sup>a,c</sup> Maria José Calhorda,<sup>a</sup> Carla D. Nunes,<sup>a</sup>**

<sup>a</sup>Centro de Química e Bioquímica, DQB, Faculdade de Ciências, Universidade de Lisboa, Campo Grande, Ed. C8, 1749-016 Lisboa, Portugal.

<sup>b</sup>Dipartimento di Fisica e Chimica, University of Palermo, Viale delle Scienze Ed. 17, 90128 Palermo, Italy

<sup>c</sup>ISIS Facility, Rutherford Appleton Laboratory, Chilton, Didcot, Oxfordshire OX11 0QX, UK

<sup>d</sup>Centro de Química Estrutural, Instituto Superior Técnico, Universidade de Lisboa, Av. Rovisco Pais, 1049-001 Lisboa, Portugal

### Supporting Information

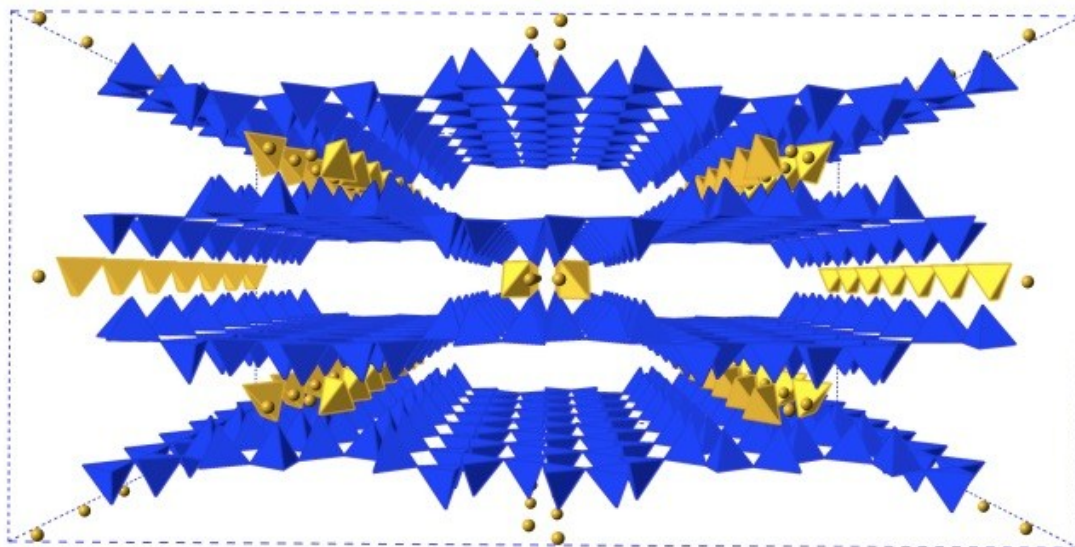

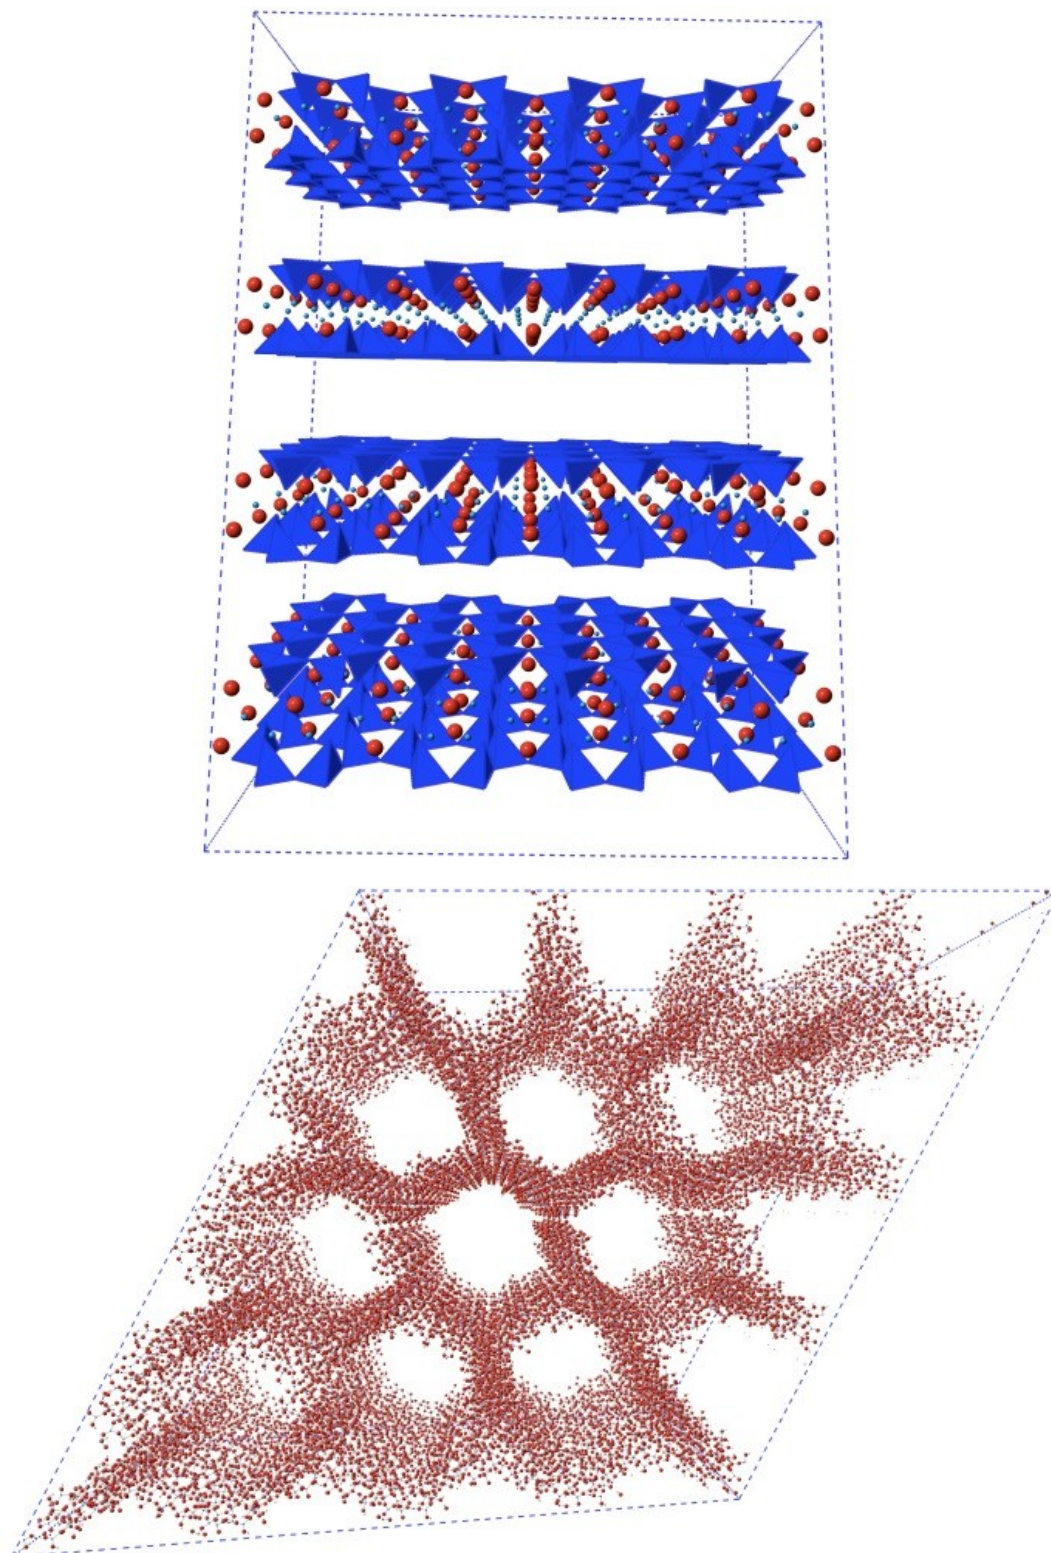

**Figure S1.** Structures of Sepiolite (SEP, top), Montmorillonite (MMT, middle) and MCM-41 (bottom). The void spaces in the structures of the inorganic materials are the spots where Retinol will be hosted.
